# Supplementary material
Source: publisher site journal article supplement (https://static.cambridge.org/content/id/urn:cambridge.org:id:article:S1368980020002517/resource/name/S1368980020002517supp001.pdf)
Supplement: Supplementary file 1 [file S1368980020002517supp001.pdf]

1 **Supplementary materials**

2

3 **Table 1.** Nutritional information of the products included in the comparison task of three labels within three categories.

4

| Category | Product | Portion            | Calories<br>(kcal/portion) | Carbohydrates<br>(g/portion) | Sugars<br>(g/portion) | Fat<br>(g/portion) | Saturated fat<br>(g/ portion) | Sodium<br>(mg/portion) |
|----------|---------|--------------------|----------------------------|------------------------------|-----------------------|--------------------|-------------------------------|------------------------|
| Cookies  | 1**     | 25.5 g (2 cookies) | 116                        | 17                           | 5.4                   | 4.3                | 0.5                           | 41                     |
|          | 2       | 30 g (3 cookies)   | 138                        | 20                           | <b>7.8</b>            | 4.3                | 0.4                           | 84                     |
|          | 3       | 30 g (3 cookies)   | 118                        | 17                           | <b>7.4</b>            | <b>4.6</b>         | 0.5                           | 79                     |
| Juice    | 1       | 200 ml (1 cup)     | 86                         | 21                           | <b>21</b>             | 0                  | 0                             | 9                      |
|          | 2**     | 200 ml (1 cup)     | 82                         | 19                           | 19*                   | 0                  | 0                             | 0                      |
|          | 3       | 200 ml (1 cup)     | 98                         | 24                           | <b>24</b>             | 0                  | 0                             | 18                     |
| Yogurt   | 1**     | 200 g (1 cup)      | 112                        | 20                           | 12.4                  | 1.2                | 0.8                           | 80                     |
|          | 2       | 200 g (1 cup)      | 158                        | 26                           | <b>18.4</b>           | 3.1                | 1.9                           | 72                     |
|          | 3       | 200 ml (1 cup)     | 194                        | 29                           | <b>21.4</b>           | 5.4                | 3.5                           | 110                    |

5

6 Notes: The content of the nutrients highlighted in bold was categorized as excessive according to the Uruguayan legislation.<sup>14</sup> \* Indicates that the product did  
7 not contain the nutrient added during the manufacturing process and therefore the excessive content of the nutrient was not considered. \*\* Highlights the  
8 product regarded as most healthful within the set.

9

10 **Table 2.** Nutritional information of the products included in the task involving the evaluation of the nutritional composition of labels of seven  
11 categories.

12

| Category          | Portion              | Calories<br>(kcal/portion) | Carbohydrates<br>(g/portion) | Sugars<br>(g/portion) | Fat<br>(g/portion) | Saturated fat<br>(g/ portion) | Sodium<br>(mg/portion) |
|-------------------|----------------------|----------------------------|------------------------------|-----------------------|--------------------|-------------------------------|------------------------|
| Canned green peas | 130 g (1 tea cup)    | 127                        | 19                           | -                     | 0.8                | -                             | <b>741</b>             |
| Cookies           | 30 g (3 cookies)     | 118                        | 17                           | <b>7.4</b>            | <b>4.6</b>         | 0.5                           | 79                     |
| Crackers          | 29 g (6 crackers)    | 123                        | 19                           | 1                     | 3.9                | 0.3                           | <b>239</b>             |
| Cream cheese      | 30 g (3 soup spoons) | 39                         | 2.3                          | -                     | <b>2.1</b>         | <b>1.4</b>                    | 44                     |
| Dairy dessert     | 100 g (1 container)  | 88                         | 15                           | <b>10</b>             | 1.4                | 0.8                           | 110                    |
| Granola           | 40 g (1/2 cup)       | 139                        | 31                           | <b>12</b>             | 0.6                | 0.1                           | 99                     |
| Soup              | 9 g (1 packet)       | 30                         | 6.3                          | <b>1.9</b>            | -                  | -                             | <b>446</b>             |

13

14 Notes: The content of the nutrients highlighted in bold was categorized as excessive according to the Uruguayan legislation.<sup>14</sup>
